# Supplementary material
Source: publisher figshare collection journal article supplement (https://sage.figshare.com/ndownloader/files/15254372)
Supplement: Supplementary file 1 [file 15254372]

## Supplemental Table 1

### Concordance in Open-ended Responses

#### Part 1: Concordance in open-ended responses for IOS-CC with communal coping measures

|                        | <i>n</i> | IOS-CC | Self-report CC | We-Talk | Observed CC |
|------------------------|----------|--------|----------------|---------|-------------|
| Discussion of diabetes | 4        | .05    | -.07           | -.20+   | -.09        |
| Diabetes support       | 25       | .16    | .22*           | .09     | .10         |
| Illness appraisal      | 11       | -.10   | .12            | .15     | .04         |
| Teamwork               | 8        | .07    | .14            | .27*    | .03         |
| Think alike            | 4        | -.08   | -.03           | .04     | -.09        |

#### Part 2: Concordance in open-ended response for IOS with relationship quality measures

|                  | <i>n</i> | IOS-CC | Self-report CC | We-Talk | Observed CC |
|------------------|----------|--------|----------------|---------|-------------|
| Closeness        | 4        | .05    | -.00           | -.07    | -.06        |
| Think alike      | 9        | .17    | .21*           | .03     | .01         |
| Teamwork         | 11       | .12    | .23*           | .08     | .29**       |
| independence     | 3        | -.14   | -.05           | -.04    | -.11        |
| time together    | 8        | .07    | .12            | .09     | .11         |
| connectedness    | 15       | .06    | .18+           | .19+    | -.11        |
| support          | 0        |        |                |         |             |
| quality of relat | 3        | .04    | .05            | -.16    | -.11        |

Notes: *n* represents the total number of couples in which both persons mentioned this interpretation (i.e., the number of concordant values); CC = communal coping; +  $p < .10$ ; \*  $p < .05$ ; \*\*  $p < .01$

Supplemental Table 2

**Intercorrelations Among Study Variables**

|                         | 1.     | 2.     | 3.     | 4.     | 5.     | 6.     | 7.     |
|-------------------------|--------|--------|--------|--------|--------|--------|--------|
| 1. IOS                  | .27*** | .45*** | .54*** | .70*** | .27*** | .18*   | .22**  |
| 2. IOS-CC               | .51*** | .15*   | .23**  | .31*** | .57*** | .21**  | .20**  |
| 3. Intimacy             | .54*** | .28*** | .43*** | .76*** | .25*** | .05    | .16*   |
| 4. Relationship quality | .60*** | .28*** | .76*** | .38*** | .22**  | .09    | .17*   |
| 5. Self-report CC       | .28*** | .42*** | .35*** | .33*** | .36*** | .20**  | .27*** |
| 6. We-talk              | .06    | .16*   | .10    | .11    | .24*** | .14*   | .28*** |
| 7. Observed CC          | .14*   | .22**  | .23**  | .18*   | .33*** | .31*** | .49*** |

Note: Upper diagonal = spouse; lower diagonal = patient; diagonal represents the correlations between patients and spouses; \*  $p < .05$ ; \*\*  $p < .01$ ; \*\*\*  $p < .001$ .

IOS: Please look at these pictures and tell me which one best describes your **current** relationship with your partner.

The figure displays seven Venn diagrams, numbered 1 through 7, illustrating different conceptual models of the relationship between 'Self' and 'Other'.

- Diagram 1:** Two separate, non-overlapping circles. The left circle is labeled 'Self' and the right circle is labeled 'Other'.
- Diagram 2:** Two overlapping circles. The left circle is labeled 'Self' and the right circle is labeled 'Other'.
- Diagram 3:** Two overlapping circles. The left circle is labeled 'Self' and the right circle is labeled 'Other'.
- Diagram 4:** Two overlapping circles. The left circle is labeled 'Self' and the right circle is labeled 'Other'.
- Diagram 5:** Two overlapping circles. The left circle is labeled 'Self' and the right circle is labeled 'Other'.
- Diagram 6:** Two overlapping circles. The left circle is labeled 'Self' and the right circle is labeled 'Other'.
- Diagram 7:** A single circle with two concentric circles inside it. The left side of the outer circle is labeled 'Self' and the right side is labeled 'Other'.

IOS-CC: Please look at these pictures again and tell me which one best describes how you and your spouse deal with diabetes.

The figure displays seven Venn diagrams, numbered 1 through 7, illustrating different conceptual models of the relationship between 'Self' and 'Other'.

- Diagram 1:** Two separate, non-overlapping circles. The left circle is labeled 'Self' and the right circle is labeled 'Other'.
- Diagram 2:** Two overlapping circles. The left circle is labeled 'Self' and the right circle is labeled 'Other'.
- Diagram 3:** Two overlapping circles. The left circle is labeled 'Self' and the right circle is labeled 'Other'.
- Diagram 4:** Two overlapping circles. The left circle is labeled 'Self' and the right circle is labeled 'Other'.
- Diagram 5:** Two overlapping circles. The left circle is labeled 'Self' and the right circle is labeled 'Other'.
- Diagram 6:** Two overlapping circles. The left circle is labeled 'Self' and the right circle is labeled 'Other'.
- Diagram 7:** A single circle with two overlapping paths or boundaries within it. The left side is labeled 'Self' and the right side is labeled 'Other'.

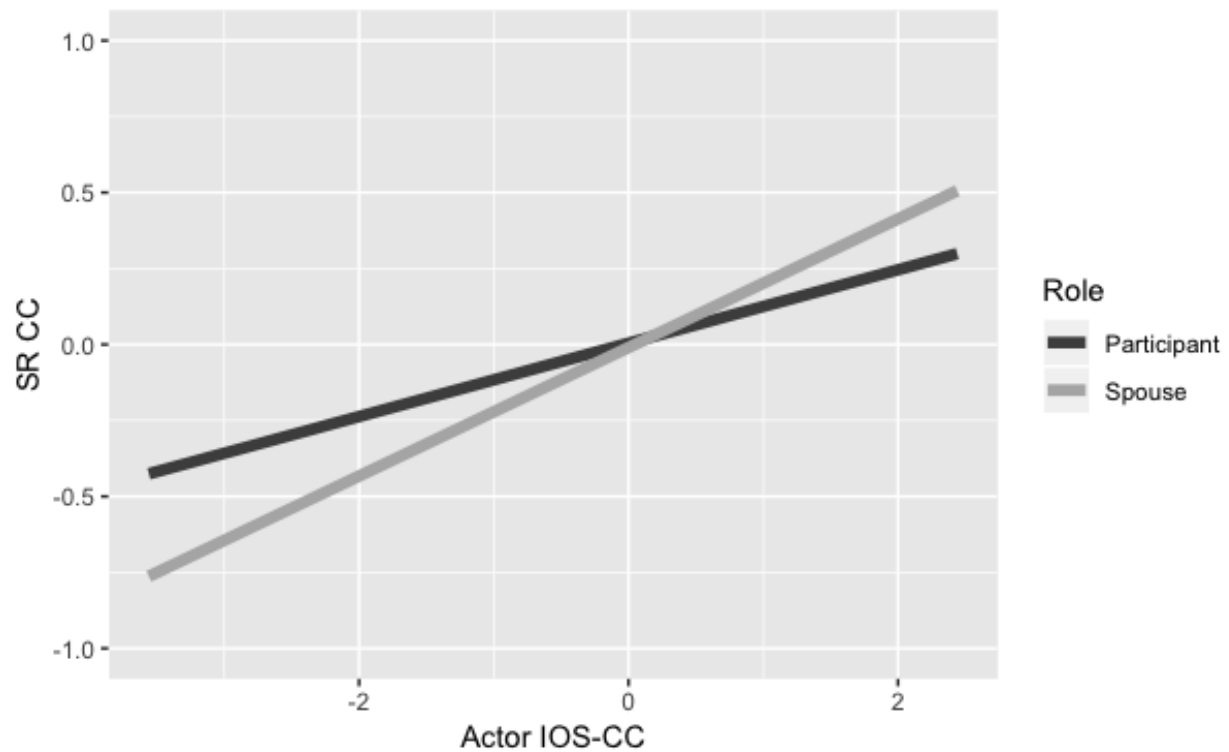

Supplemental Figure 2: Interaction between Actor IOS-CC and role (patient/spouse) on self-report communal coping: estimate =  $-.09^*$  (SE .04). The relation of actor IOS-CC to self-reported communal coping is stronger for spouses than patients.

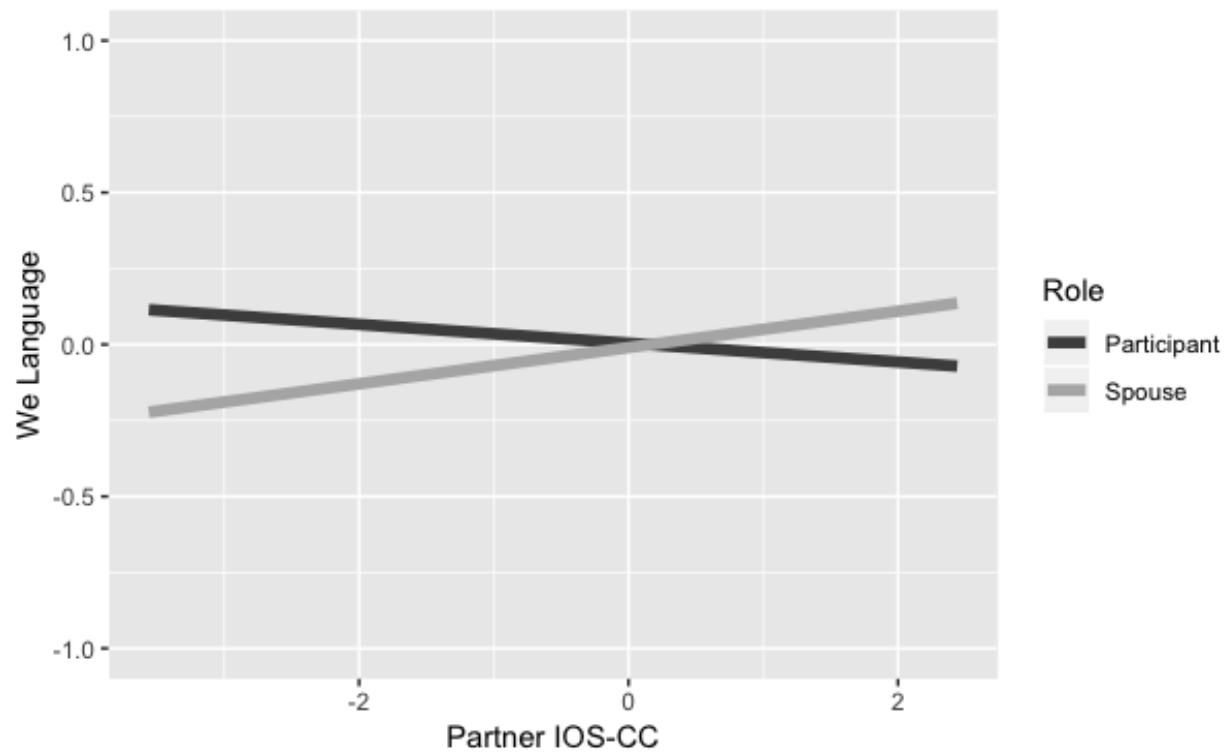

Supplemental Figure 3: Interaction between Partner IOS-CC and role (patient/spouse) on we-language: estimate = .03\* (SE .02). Partner IOS-CC is related to greater spouse we-language. However, partner IOS-CC is unrelated to patient we-language.
